# Supplementary material
Source: PubMed Central journal article supplement (PMC6064655)
Supplement: NIHMS938613-supplement-supplement_1.pdf [file NIHMS938613-supplement-supplement_1.pdf]

| <b>Supplementary Table 1. Associations of eating school breakfast 0 days, 1-4 days, and every day with dietary outcomes in the Healthy Communities Study (N=5,106)<sup>a,b</sup></b>                                                                                                                                                                                                                                                                                                                                                                                                                                                                                                                                                                                                                                                                                                                                                                                                                                                                                |                                |                       |                            |
|---------------------------------------------------------------------------------------------------------------------------------------------------------------------------------------------------------------------------------------------------------------------------------------------------------------------------------------------------------------------------------------------------------------------------------------------------------------------------------------------------------------------------------------------------------------------------------------------------------------------------------------------------------------------------------------------------------------------------------------------------------------------------------------------------------------------------------------------------------------------------------------------------------------------------------------------------------------------------------------------------------------------------------------------------------------------|--------------------------------|-----------------------|----------------------------|
|                                                                                                                                                                                                                                                                                                                                                                                                                                                                                                                                                                                                                                                                                                                                                                                                                                                                                                                                                                                                                                                                     | <b>Coefficient<sup>c</sup></b> | <b>Standard Error</b> | <b>P-value<sup>d</sup></b> |
| <b>Fruits/Vegetables/Legumes (cup/day)</b>                                                                                                                                                                                                                                                                                                                                                                                                                                                                                                                                                                                                                                                                                                                                                                                                                                                                                                                                                                                                                          |                                |                       |                            |
| 0 (ref) vs 1-4 days                                                                                                                                                                                                                                                                                                                                                                                                                                                                                                                                                                                                                                                                                                                                                                                                                                                                                                                                                                                                                                                 | 0.06                           | 0.04                  | 0.30                       |
| 1-4 (ref) vs Every day                                                                                                                                                                                                                                                                                                                                                                                                                                                                                                                                                                                                                                                                                                                                                                                                                                                                                                                                                                                                                                              | 0.04                           | 0.04                  | 0.93                       |
| 0 (ref) vs Every day                                                                                                                                                                                                                                                                                                                                                                                                                                                                                                                                                                                                                                                                                                                                                                                                                                                                                                                                                                                                                                                | 0.10                           | 0.04                  | <b>0.018</b>               |
| <b>Whole Grain (oz/day)</b>                                                                                                                                                                                                                                                                                                                                                                                                                                                                                                                                                                                                                                                                                                                                                                                                                                                                                                                                                                                                                                         |                                |                       |                            |
| 0 vs 1-4 days                                                                                                                                                                                                                                                                                                                                                                                                                                                                                                                                                                                                                                                                                                                                                                                                                                                                                                                                                                                                                                                       | 0.02                           | 0.02                  | 0.60                       |
| 1-4 vs Every day                                                                                                                                                                                                                                                                                                                                                                                                                                                                                                                                                                                                                                                                                                                                                                                                                                                                                                                                                                                                                                                    | 0.07                           | 0.02                  | <b>&lt;0.01</b>            |
| 0 vs Every day                                                                                                                                                                                                                                                                                                                                                                                                                                                                                                                                                                                                                                                                                                                                                                                                                                                                                                                                                                                                                                                      | 0.09                           | 0.02                  | <b>&lt;0.01</b>            |
| <b>Dairy (cup/day)</b>                                                                                                                                                                                                                                                                                                                                                                                                                                                                                                                                                                                                                                                                                                                                                                                                                                                                                                                                                                                                                                              |                                |                       |                            |
| 0 vs 1-4 days                                                                                                                                                                                                                                                                                                                                                                                                                                                                                                                                                                                                                                                                                                                                                                                                                                                                                                                                                                                                                                                       | 0.05                           | 0.03                  | 0.27                       |
| 1-4 vs Every day                                                                                                                                                                                                                                                                                                                                                                                                                                                                                                                                                                                                                                                                                                                                                                                                                                                                                                                                                                                                                                                    | 0.07                           | 0.03                  | <b>0.042</b>               |
| 0 vs Every day                                                                                                                                                                                                                                                                                                                                                                                                                                                                                                                                                                                                                                                                                                                                                                                                                                                                                                                                                                                                                                                      | 0.12                           | 0.03                  | <b>&lt;0.01</b>            |
| <b>Dietary Fiber (g/day)</b>                                                                                                                                                                                                                                                                                                                                                                                                                                                                                                                                                                                                                                                                                                                                                                                                                                                                                                                                                                                                                                        |                                |                       |                            |
| 0 vs 1-4 days                                                                                                                                                                                                                                                                                                                                                                                                                                                                                                                                                                                                                                                                                                                                                                                                                                                                                                                                                                                                                                                       | 0.26                           | 0.15                  | 0.27                       |
| 1-4 vs Every day                                                                                                                                                                                                                                                                                                                                                                                                                                                                                                                                                                                                                                                                                                                                                                                                                                                                                                                                                                                                                                                    | 0.28                           | 0.15                  | 0.15                       |
| 0 vs Every day                                                                                                                                                                                                                                                                                                                                                                                                                                                                                                                                                                                                                                                                                                                                                                                                                                                                                                                                                                                                                                                      | 0.54                           | 0.15                  | <b>0.0006</b>              |
| <b>Calcium (mg/day)</b>                                                                                                                                                                                                                                                                                                                                                                                                                                                                                                                                                                                                                                                                                                                                                                                                                                                                                                                                                                                                                                             |                                |                       |                            |
| 0 vs 1-4 days                                                                                                                                                                                                                                                                                                                                                                                                                                                                                                                                                                                                                                                                                                                                                                                                                                                                                                                                                                                                                                                       | 18.90                          | 9.26                  | 0.12                       |
| 1-4 vs Every day                                                                                                                                                                                                                                                                                                                                                                                                                                                                                                                                                                                                                                                                                                                                                                                                                                                                                                                                                                                                                                                    | 24.90                          | 9.15                  | <b>0.021</b>               |
| 0 vs Every day                                                                                                                                                                                                                                                                                                                                                                                                                                                                                                                                                                                                                                                                                                                                                                                                                                                                                                                                                                                                                                                      | 43.70                          | 9.05                  | <b>&lt;0.01</b>            |
| <b>Added Sugar (tsp/day)</b>                                                                                                                                                                                                                                                                                                                                                                                                                                                                                                                                                                                                                                                                                                                                                                                                                                                                                                                                                                                                                                        |                                |                       |                            |
| 0 vs 1-4 days                                                                                                                                                                                                                                                                                                                                                                                                                                                                                                                                                                                                                                                                                                                                                                                                                                                                                                                                                                                                                                                       | 0.52                           | 0.28                  | 0.21                       |
| 1-4 vs Every day                                                                                                                                                                                                                                                                                                                                                                                                                                                                                                                                                                                                                                                                                                                                                                                                                                                                                                                                                                                                                                                    | -0.05                          | 0.28                  | 1.00                       |
| 0 vs Every day                                                                                                                                                                                                                                                                                                                                                                                                                                                                                                                                                                                                                                                                                                                                                                                                                                                                                                                                                                                                                                                      | 0.47                           | 0.28                  | 0.27                       |
| <b>Sugar from Sugar-Sweetened Beverages (tsp/day)</b>                                                                                                                                                                                                                                                                                                                                                                                                                                                                                                                                                                                                                                                                                                                                                                                                                                                                                                                                                                                                               |                                |                       |                            |
| 0 vs 1-4 days                                                                                                                                                                                                                                                                                                                                                                                                                                                                                                                                                                                                                                                                                                                                                                                                                                                                                                                                                                                                                                                       | 0.29                           | 0.17                  | 0.27                       |
| 1-4 vs Every day                                                                                                                                                                                                                                                                                                                                                                                                                                                                                                                                                                                                                                                                                                                                                                                                                                                                                                                                                                                                                                                    | -0.29                          | 0.17                  | 0.32                       |
| 0 vs Every day                                                                                                                                                                                                                                                                                                                                                                                                                                                                                                                                                                                                                                                                                                                                                                                                                                                                                                                                                                                                                                                      | -0.01                          | 0.16                  | 1.00                       |
| <b>Energy-dense Foods of Minimal Nutritional Value (times/day)</b>                                                                                                                                                                                                                                                                                                                                                                                                                                                                                                                                                                                                                                                                                                                                                                                                                                                                                                                                                                                                  |                                |                       |                            |
| 0 vs 1-4 days                                                                                                                                                                                                                                                                                                                                                                                                                                                                                                                                                                                                                                                                                                                                                                                                                                                                                                                                                                                                                                                       | 0.02                           | 0.07                  | 1.00                       |
| 1-4 vs Every day                                                                                                                                                                                                                                                                                                                                                                                                                                                                                                                                                                                                                                                                                                                                                                                                                                                                                                                                                                                                                                                    | 0.03                           | 0.07                  | 1.00                       |
| 0 vs Every day                                                                                                                                                                                                                                                                                                                                                                                                                                                                                                                                                                                                                                                                                                                                                                                                                                                                                                                                                                                                                                                      | 0.06                           | 0.07                  | 1.00                       |
| <sup>a</sup> Multilevel model adjusted for: Child-level variables: age (as polynomial with degrees as follows: 1 for fruit and vegetables and calcium; 2 for dairy, whole grains, dietary fiber, 3 for sugar from sugar-sweetened beverages; 4 for total added sugar, energy-dense foods of minimal nutritional value), gender, race/ethnicity, annual household income, maximum parental education, maximum parental employment, seasonality of interview (based on sinusoidal curve over time). Community-level variables: U.S. region, minority, urbanicity, proportion of population below the federal poverty level, percent of population unemployed, and percent catchment area with children that are African American, Hispanic. Standard errors are clustered at community and school level.<br><sup>b</sup> Sample sizes: n=2,152 (0 days), n=1,161 (1-4 days), n=1,791 (5days).<br><sup>c</sup> Reference groups are listed first, i.e., 0 days, 0 days, 1-4 days.<br><sup>d</sup> Original P-values adjusted by using Bonferroni approach (P-value*3). |                                |                       |                            |

**Supplementary Table 2. Associations of eating school lunch 0 days, 1-4 days, and every day with dietary outcomes in the Healthy Communities Study (N=5,106)<sup>a,b</sup>**

|                                                                                                                                                                                                                                                                                                                                                                                                                                                                                                                                                                                                                                                                                                                                                                                                                                                                                                                                                                                                                                                                    | <b>Coefficient<sup>c</sup></b> | <b>Standard Error</b> | <b>P-value<sup>d</sup></b> |
|--------------------------------------------------------------------------------------------------------------------------------------------------------------------------------------------------------------------------------------------------------------------------------------------------------------------------------------------------------------------------------------------------------------------------------------------------------------------------------------------------------------------------------------------------------------------------------------------------------------------------------------------------------------------------------------------------------------------------------------------------------------------------------------------------------------------------------------------------------------------------------------------------------------------------------------------------------------------------------------------------------------------------------------------------------------------|--------------------------------|-----------------------|----------------------------|
| <b>Fruits/Vegetables/Legumes (cup/day)</b>                                                                                                                                                                                                                                                                                                                                                                                                                                                                                                                                                                                                                                                                                                                                                                                                                                                                                                                                                                                                                         |                                |                       |                            |
| 0 (ref) vs 1-4 days                                                                                                                                                                                                                                                                                                                                                                                                                                                                                                                                                                                                                                                                                                                                                                                                                                                                                                                                                                                                                                                | 0.01                           | 0.04                  | 1.00                       |
| 1-4 (ref) vs Every day                                                                                                                                                                                                                                                                                                                                                                                                                                                                                                                                                                                                                                                                                                                                                                                                                                                                                                                                                                                                                                             | 0.05                           | 0.03                  | 0.36                       |
| 0 (ref) vs Every day                                                                                                                                                                                                                                                                                                                                                                                                                                                                                                                                                                                                                                                                                                                                                                                                                                                                                                                                                                                                                                               | 0.05                           | 0.04                  | 0.63                       |
| <b>Whole Grain (oz/day)</b>                                                                                                                                                                                                                                                                                                                                                                                                                                                                                                                                                                                                                                                                                                                                                                                                                                                                                                                                                                                                                                        |                                |                       |                            |
| 0 vs 1-4 days                                                                                                                                                                                                                                                                                                                                                                                                                                                                                                                                                                                                                                                                                                                                                                                                                                                                                                                                                                                                                                                      | -0.01                          | 0.02                  | 1.00                       |
| 1-4 vs Every day                                                                                                                                                                                                                                                                                                                                                                                                                                                                                                                                                                                                                                                                                                                                                                                                                                                                                                                                                                                                                                                   | 0.02                           | 0.02                  | 0.45                       |
| 0 vs Every day                                                                                                                                                                                                                                                                                                                                                                                                                                                                                                                                                                                                                                                                                                                                                                                                                                                                                                                                                                                                                                                     | 0.02                           | 0.02                  | 1.00                       |
| <b>Dairy (cup/day)</b>                                                                                                                                                                                                                                                                                                                                                                                                                                                                                                                                                                                                                                                                                                                                                                                                                                                                                                                                                                                                                                             |                                |                       |                            |
| 0 vs 1-4 days                                                                                                                                                                                                                                                                                                                                                                                                                                                                                                                                                                                                                                                                                                                                                                                                                                                                                                                                                                                                                                                      | 0.07                           | 0.03                  | 0.12                       |
| 1-4 vs Every day                                                                                                                                                                                                                                                                                                                                                                                                                                                                                                                                                                                                                                                                                                                                                                                                                                                                                                                                                                                                                                                   | 0.09                           | 0.02                  | <b>0.0003</b>              |
| 0 vs Every day                                                                                                                                                                                                                                                                                                                                                                                                                                                                                                                                                                                                                                                                                                                                                                                                                                                                                                                                                                                                                                                     | 0.16                           | 0.03                  | <b>&lt;0.01</b>            |
| <b>Dietary Fiber (g/day)</b>                                                                                                                                                                                                                                                                                                                                                                                                                                                                                                                                                                                                                                                                                                                                                                                                                                                                                                                                                                                                                                       |                                |                       |                            |
| 0 vs 1-4 days                                                                                                                                                                                                                                                                                                                                                                                                                                                                                                                                                                                                                                                                                                                                                                                                                                                                                                                                                                                                                                                      | -0.07                          | 0.17                  | 1.00                       |
| 1-4 vs Every day                                                                                                                                                                                                                                                                                                                                                                                                                                                                                                                                                                                                                                                                                                                                                                                                                                                                                                                                                                                                                                                   | 0.25                           | 0.13                  | 0.18                       |
| 0 vs Every day                                                                                                                                                                                                                                                                                                                                                                                                                                                                                                                                                                                                                                                                                                                                                                                                                                                                                                                                                                                                                                                     | 0.18                           | 0.17                  | 0.87                       |
| <b>Calcium (mg/day)</b>                                                                                                                                                                                                                                                                                                                                                                                                                                                                                                                                                                                                                                                                                                                                                                                                                                                                                                                                                                                                                                            |                                |                       |                            |
| 0 vs 1-4 days                                                                                                                                                                                                                                                                                                                                                                                                                                                                                                                                                                                                                                                                                                                                                                                                                                                                                                                                                                                                                                                      | 22.04                          | 10.70                 | 0.12                       |
| 1-4 vs Every day                                                                                                                                                                                                                                                                                                                                                                                                                                                                                                                                                                                                                                                                                                                                                                                                                                                                                                                                                                                                                                                   | 25.24                          | 8.03                  | <b>0.006</b>               |
| 0 vs Every day                                                                                                                                                                                                                                                                                                                                                                                                                                                                                                                                                                                                                                                                                                                                                                                                                                                                                                                                                                                                                                                     | 47.30                          | 10.30                 | <b>&lt;0.01</b>            |
| <b>Added Sugar (tsp/day)</b>                                                                                                                                                                                                                                                                                                                                                                                                                                                                                                                                                                                                                                                                                                                                                                                                                                                                                                                                                                                                                                       |                                |                       |                            |
| 0 vs 1-4 days                                                                                                                                                                                                                                                                                                                                                                                                                                                                                                                                                                                                                                                                                                                                                                                                                                                                                                                                                                                                                                                      | 0.59                           | 0.32                  | 0.21                       |
| 1-4 vs Every day                                                                                                                                                                                                                                                                                                                                                                                                                                                                                                                                                                                                                                                                                                                                                                                                                                                                                                                                                                                                                                                   | -0.12                          | 0.25                  | 1.00                       |
| 0 vs Every day                                                                                                                                                                                                                                                                                                                                                                                                                                                                                                                                                                                                                                                                                                                                                                                                                                                                                                                                                                                                                                                     | 0.47                           | 0.31                  | 0.39                       |
| <b>Sugar from Sugar-Sweetened Beverages (tsp/day)</b>                                                                                                                                                                                                                                                                                                                                                                                                                                                                                                                                                                                                                                                                                                                                                                                                                                                                                                                                                                                                              |                                |                       |                            |
| 0 vs 1-4 days                                                                                                                                                                                                                                                                                                                                                                                                                                                                                                                                                                                                                                                                                                                                                                                                                                                                                                                                                                                                                                                      | 0.36                           | 0.19                  | 0.21                       |
| 1-4 vs Every day                                                                                                                                                                                                                                                                                                                                                                                                                                                                                                                                                                                                                                                                                                                                                                                                                                                                                                                                                                                                                                                   | -0.18                          | 0.15                  | 0.63                       |
| 0 vs Every day                                                                                                                                                                                                                                                                                                                                                                                                                                                                                                                                                                                                                                                                                                                                                                                                                                                                                                                                                                                                                                                     | 0.17                           | 0.19                  | 1.00                       |
| <b>Energy-dense Foods of Minimal Nutritional Value (times/day)</b>                                                                                                                                                                                                                                                                                                                                                                                                                                                                                                                                                                                                                                                                                                                                                                                                                                                                                                                                                                                                 |                                |                       |                            |
| 0 vs 1-4 days                                                                                                                                                                                                                                                                                                                                                                                                                                                                                                                                                                                                                                                                                                                                                                                                                                                                                                                                                                                                                                                      | 0.05                           | 0.08                  | 1.00                       |
| 1-4 vs Every day                                                                                                                                                                                                                                                                                                                                                                                                                                                                                                                                                                                                                                                                                                                                                                                                                                                                                                                                                                                                                                                   | 0.0004                         | 0.06                  | 1.00                       |
| 0 vs Every day                                                                                                                                                                                                                                                                                                                                                                                                                                                                                                                                                                                                                                                                                                                                                                                                                                                                                                                                                                                                                                                     | 0.05                           | 0.08                  | 1.00                       |
| <sup>a</sup> Multilevel model adjusted for: Child-level variables: age (as polynomial with degrees as follows: 1 for fruit and vegetables and calcium; 2 for dairy, whole grains, dietary fiber, 3 for sugar from sugar-sweetened beverages; 4 for total added sugar, energy-dense foods of minimal nutritional value), gender, race/ethnicity, annual household income, maximum parental education, maximum parental employment, seasonality of interview (based on sinusoidal curve over time). Community-level variables: U.S. region, minority, urbanicity, proportion of population below the federal poverty level, percent of population unemployed, and percent catchment area with children that are African American, Hispanic. Standard errors are clustered at community and school level.<br><sup>b</sup> Sample sizes: n=808 (0 days), n=1,317 (1-4 days), n=2,981 (5 days).<br><sup>c</sup> Reference groups are listed first, i.e., 0 days, 0 days, 1-4 days.<br><sup>d</sup> Original P-values adjusted by using Bonferroni approach (P-value*3). |                                |                       |                            |
